# Supplementary material for: Polyhydroxyalkanoate (PHA) Biopolymer Synthesis by Marine Bacteria of the Malaysian Coral Triangle Region and Mining for PHA Synthase Genes
Source: MDPI journal article supplement (doi:10.3390/microorganisms10102057), 2022-10-18
Supplement: s1 [file s1]

## Supplementary Material

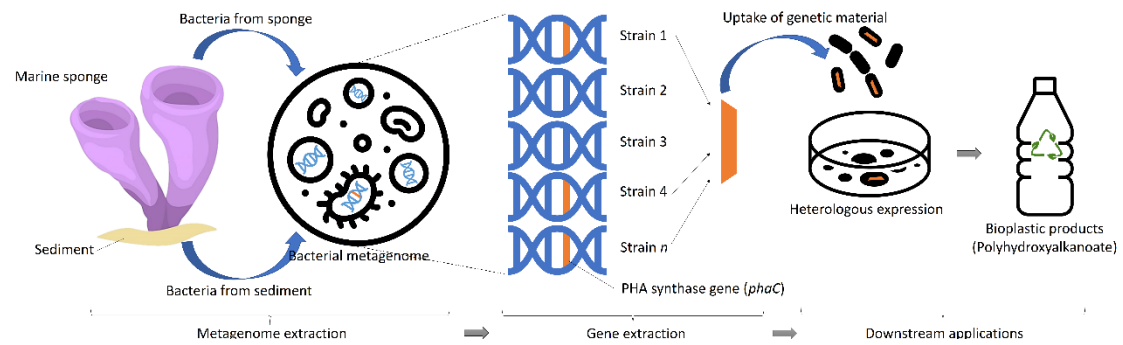

**Figure S1.** The roles and functions of metagenome extraction and gene extraction in the downstream applications and future study of the isolated genes.

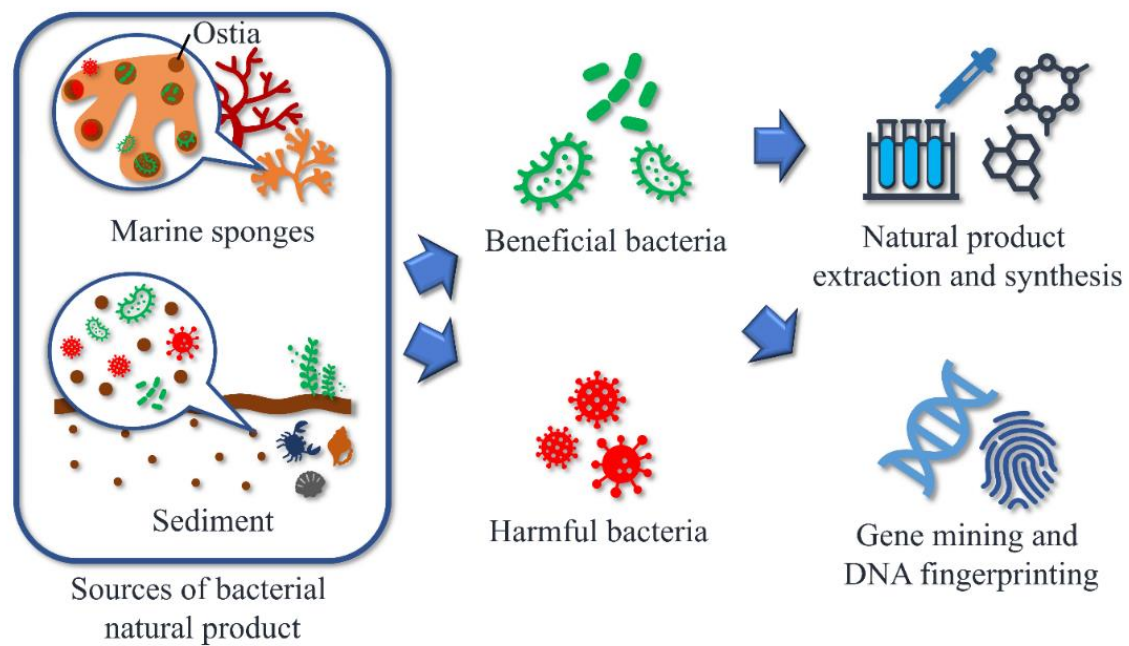

**Figure S2.** The roles of marine sponges, sediment, and their bacterial symbionts in the advances of marine natural products within the fields of biochemistry and molecular biology.

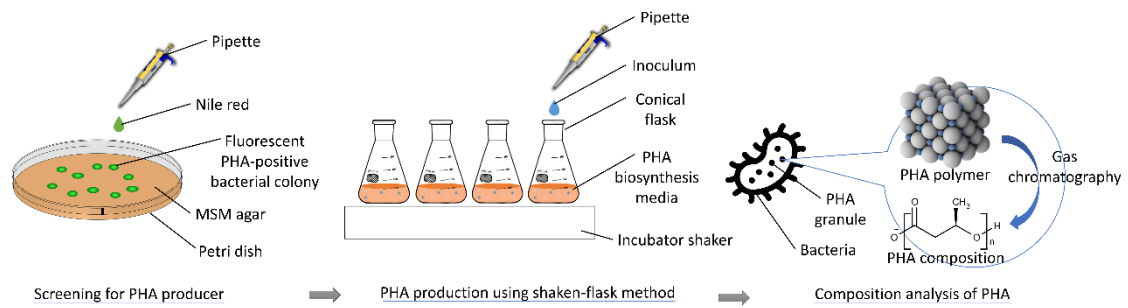

**Figure S3.** Workflow schematics from screening for PHA-producing strains using Nile blue, PHA production using shaken-flask fermentation, to PHA composition analysis using gas chromatography.

**Text S1.** 16S rRNA sequence of *Sphingobacterium mizutaii* strain UMTKB-6

CCACGCTCCTTGCGGTTACATGCTTTAGGTACCCCCAGCTTTCATGGCTTGACGGGCGGTGTGT  
ACAAGGCCCGGGAACGTATTACCGCGTCATTGCTGATACGCGATTACTAGCGAATCCAAC  
TCACGGGGTCGAGTTGCAGACCCCGATCCGAACGTGAATGGCTTTTCGAGATTGGCACCAC  
ATTGCTGTGTAGCTGCCCCGCTGTACCATCCATTGTAGCACGTGTGTAGCCCCGGACGTAAGGG  
CCATGATGACTTGACGTCGTCCCCGCCTTCCTCTCTGCTTGCGCAGGCAGTCTGTTTAGAGTCC  
CCACCTTGACGTGCTGGCAACTAAACATAGGGGTTGCGCTCGTTGCGGGACTTAACCCAACA  
CCTCACGGCACGAGCTGACGACAGCCATGCAGCACCTAGTTTCCTGTCCCGAAGGACGGGCG  
CGTCTCTGCGCCCTTCAGTAACCTTTCAAGCCCGGTAAGGTTCTCGCGTATCATCGAATTAA  
ACCACATGCTCCTCCGCTTGTCGGGGCCCCCGTCAATTCCTTTGAGTTTCACCCCTTGCGGGCGT  
ACTCCCCAGGTGGATGACTTAACGCTTTTCGCTTGACGCTTACGGTATATCGCAAACATCGAG  
TCATCATCGTTTAGGGCGTGGACTACCAGGGTATCTAATCCTGTTTCGATCCCCACGCTTTCGTG  
CATCAGCGTCAATAACGGCTTAGACAGCTGCCTTCGCAATCGGTGTTCTGAGACATATCTATG  
CATTTACCCGCTACTTGTCTCATTCGCGCGTCTTCAACCGCATTCAAGCACTTCAGTATCAAGG  
GCACTGCGACAGTTGAGCTGCCGTCTTTCACCCCTGACTTAAAGTGCCGCCTACGCACCCTTT  
AAACCCAATAGATCCGGATAACGCTCGGATCCTCCGTATTACCGCGGCTGCTGGCACGGAGT  
TAGCCGATCCTTATTCTTTAGGTACATTCAGCCCGCTACACGTAGCGGGGTTTATTCCCTAACA  
AAAGCAGTTTACAACCCATAGGCAGTCGTCCTGCACGCGGCATGGCTGGTTCAGGGTTGCC  
CCATTGACCATATTCCTTACTGCTGCCTCCCGTAGGAATCTGGTCCGTGTCTCAGTACCATGTG  
GGGGATTCCCTCTCAATCCCCTAGCATCGTCGCCTTGGTGGGGCGTTACCCCACTAGCTA  
ATGTCGAGCCATTCCACCCAAAAATTGACTACCTCCCGATGCCGGAAAATGCCAGGGGGGGT  
TAATCCGGATTTCCCCGGCCCCCCTAAATGGGGGTGCCCGTTTACCCCCCGGGGCCCCCCCCCT  
CGGGGACCTACCAAGGAACCCCCCAATT

**Text S2.** 16S rRNA sequence of *Alcaligenes faecalis* subsp. *faecalis* strain UMTKB-7

GCTTTACATGCAGTCGAACGGCAGCGCGAGAGAGCTTGCTCTCTTGCGGCGAGTGGCGGAC  
GGGTGAGTAATATATCGGAACGTGCCCAGTAGCGGGGGATAACTACTCGAAAGAGTGGCTA  
ATACCGCATAACGCCCTACGGGGGAAAGGGGGGGATCGCAAGACCTCTCACTATTGGAGCGG  
CCGATATCGGATTAGCTAGTTGGTGGGGTAAAGGCTCACCAAGGCAACGATCCGTAGCTGGT  
TTGAGAGGACGACCAGCCACACTGGGACTGAGACACGGCCCAGACTCCTACGGGAGGCAGC  
AGTGGGGAATTTTGGACAATGGGGGAAACCCTGATCCAGCCATCCCGCGTGTATGATGAAGG  
CCTTCGGGTTCTAAAGTACTTTTGGCAGAGAAGAAAAGGTATCCCCTAATACGGGATACTGCT  
GACGGTATCTGCAGAATAAGCACCGGCTAACTACGTGCCAGCAGCCGCGGTAATACGTATGG  
TGCAAGCGTTAATCGGAATTACTGGGCGTAAAGCGTGTGTAGGCGGTTTCGGAAAGAAAGATG  
TGAAATCCCAGGGCTCAACCTTGGAACCTGCATTTTAACTGCCGAGCTAGAGTATGTCAGAG  
GGGGGTAGAATTCCACGTGTAGCAGTGAAATGCGTAGATATGTGGAGGAATACCGATGGCG  
AATGCAGCCCCCTGGGATAATACTG

**Text S3.** 16S rRNA sequence of *Acinetobacter calcoaceticus* strain UMTKB-8

GGCTACTGCAGTCGAGCGGAGAGAGGTAGCTTGCTACTGATCTTACGGCGGACGGGTGAGTA  
ATGCTTAGGAATCTGCCTATTAGTGGGGGACAACATTTCGAAAGGAATGCTAATACCGCATA  
CGTCCTACGGGAGAAAAGCAGGGGATCTTCGGACCTTGCGCTAATAGATGAGCCTAAGTCGGA  
TTAGCTAGTTGGTGGGGTAAAGGCCTACCAAGGCGACGATCTGTAGCGGGTCTGAGAGGATG  
ATCCGCCACACTGGGACTGAGACACGGCCCAGACTCCTACGGGAGGCAGCAGTGGGGAATA  
TTGGACAATGGGCGCAAGCCTGATCCAGCCATGCCGCGTGTGTGAAGAAGGCCTTATGGTTG  
TAAAGCACTTTAAGCGAGGAGGAGGCTACTTTAGTTAATACCTAGAGATAGTGGACGTTACT  
CGCAGAATAAGCACCGGCTAACTCTGTGCCAGCAGCCGCGGTAATACAGAGGGTGCAAGCG  
TTAATCGGATTTACTGGGCGTAAAGCGCGCGTAGGCGGCTAATTAAGTCAAATGTGAAATCC  
CCGAGCTTAACTTGGGAATTGCATTCGATACTGGTTAGCTAGAGTGTGGGAGAGGATGGTAG  
AATTCCAGGTGTAGCGGTGAAATGCGTAGAGATCTGGAGGAATACCGATGGCGAAGGCAGC  
CATCTGGCCTAACACTGACGCTGAGGTGCGAAAGCATGGGGAGCAAACAGGATTAGATACC  
CTGGTAGTCCATGCCGTAAACGATGTCTACTAGCCGTTGGGGCCTTTGAGGCTTTAGTGGCGC  
AGCTAACGCGATAAGTAGACCGCCTGGGGAGTACGGTCGCAAGACTAAAACCTCAAATGAAT  
TGACGGGGGGCCCCGCACAAGCGGTGGAGCATGTGGTTTAATTCGATGCAACGCGAAGAACCTT  
ACCTGGCCTTGACATAGTAAGAAGCTTTCCAGAGATGGATTGGTGCCTTCGGGAACCTTACATAC  
AGGTGCTGCATGGCTGTCGTCAGCTCGTGTCTGAGATGTTGGGTAAAGTCCCGCAACGAGCG  
CAACCCTTTTCTTATTTGCCAGCGAGTAATGTTCGGGAACCTTAAGGATACTGCCAGTGACAA  
ACTGGAGGAAGGCGGGGACGACGTCAAGTCATCATGGCCCTTGGCAGGGCTACCACGTGCT  
ACAATGGTCGGTACAAGGGTTGCTACCTACCGATGGAAGGCTACCAAAAAGCCCATCGATCCG  
GATGGGAGTCGGCCCCCCCCCTGAATTCGAATCCCTTCCGGAACAAAATGCCCGGTGAAAT  
TTCCCGGCCTTGAACACCCCCCGCCCCCTGGGAGTTTGTGCCCCAAAGATTCCCAATGCAA  
AGGGGTACC

**Table S1.** Retention times and peak areas of the detected monomers for *Sphingobacterium mizutaii* UMTKB-6, *Alcaligenes faecalis* UMTKB-7, and *Acinetobacter calcoaceticus* UMTKB-8.

| Strain                                     | Retention time (min) | Peak area | Monomer |
|--------------------------------------------|----------------------|-----------|---------|
| <i>Sphingobacterium mizutaii</i> UMTKB-6   | 5.795                | 538825.6  | CME     |
|                                            | 6.358                | 9937.9    | 3HHx    |
|                                            | 6.771                | 12703.4   | 3HO     |
|                                            | 7.895                | 18904.7   | 3HD     |
|                                            | 8.705                | 27077.2   | 3HUD    |
| <i>Alcaligenes faecalis</i> UMTKB-7        | 5.849                | 652389.1  | CME     |
|                                            | 7.965                | 14116     | 3HD     |
|                                            | 4.668                | Tr        | 3HV     |
|                                            | 8.774                | 34397     | 3HUD    |
| <i>Acinetobacter calcoaceticus</i> UMTKB-8 | 5.845                | 444445.1  | CME     |
|                                            | 7.864                | Tr        | 3HD     |
|                                            | 4.600                | Tr        | 3HV     |
|                                            | 8.779                | 12971.3   | 3HUD    |

**Table S2.** Cell dry weight of *Sphingobacterium mizutaii* UMTKB-6, *Alcaligenes faecalis* UMTKB-7, and *Acinetobacter calcoaceticus* UMTKB-8.

| Strain                                     | Carbon source | C:N ratio | CDW (g/L) |        |        | Average |
|--------------------------------------------|---------------|-----------|-----------|--------|--------|---------|
| <i>Sphingobacterium mizutaii</i> UMTKB-6   | Sucrose       | 20        | 0.0924    | 0.0850 | 0.0917 | 0.0897  |
|                                            |               | 30        | 0.0600    | 0.9750 | 0.1015 | 0.3788  |
|                                            |               | 40        | 0.1056    | 0.0694 | 0.0936 | 0.0895  |
|                                            |               | 50        | 0.0526    | 0.1117 | 0.0936 | 0.0860  |
| <i>Alcaligenes faecalis</i> UMTKB-7        | Glucose       | 20        | 0.0490    | 0.0230 | 0.0447 | 0.0389  |
|                                            |               | 30        | 0.0330    | 0.0587 | 0.0410 | 0.0442  |
|                                            |               | 40        | 0.0340    | 0.0510 | 0.0428 | 0.0426  |
|                                            |               | 50        | 0.0310    | 0.0321 | 0.0395 | 0.0342  |
| <i>Acinetobacter calcoaceticus</i> UMTKB-8 | Glycerol      | 20        | 0.0342    | 0.0376 | 0.0628 | 0.0449  |
|                                            |               | 30        | 0.0353    | 0.0572 | 0.0504 | 0.0476  |
|                                            |               | 40        | 0.0266    | 0.0094 | 0.0098 | 0.0153  |
|                                            |               | 50        | 0.0025    | 0.0019 | 0.0042 | 0.0029  |

**Table S3.** Primers 341F and 806R targeting 16S rRNA genes of regions V3 and V4 [26].

| Host sponge                         | Barcode sequence  | Primer sequence (5'-3')                          |
|-------------------------------------|-------------------|--------------------------------------------------|
| <i>X. muta</i><br>(Bidong Island)   | TAGCTT,<br>CGTACG | *F: CCTAYGGGRBGCASCAG<br>R: GGACTACNNGGGTATCTAAT |
| <i>A. aaptos</i><br>(Redang Island) | GGCTAC,<br>CGTACG | F: CCTAYGGGRBGCASCAG<br>R: GGACTACNNGGGTATCTAAT  |
| <i>A. aaptos</i><br>(Bidong Island) | GATCAG,<br>CGTACG | F: CCTAYGGGRBGCASCAG<br>R: GGACTACNNGGGTATCTAAT  |

\* F, forward primer; R, reverse primer.

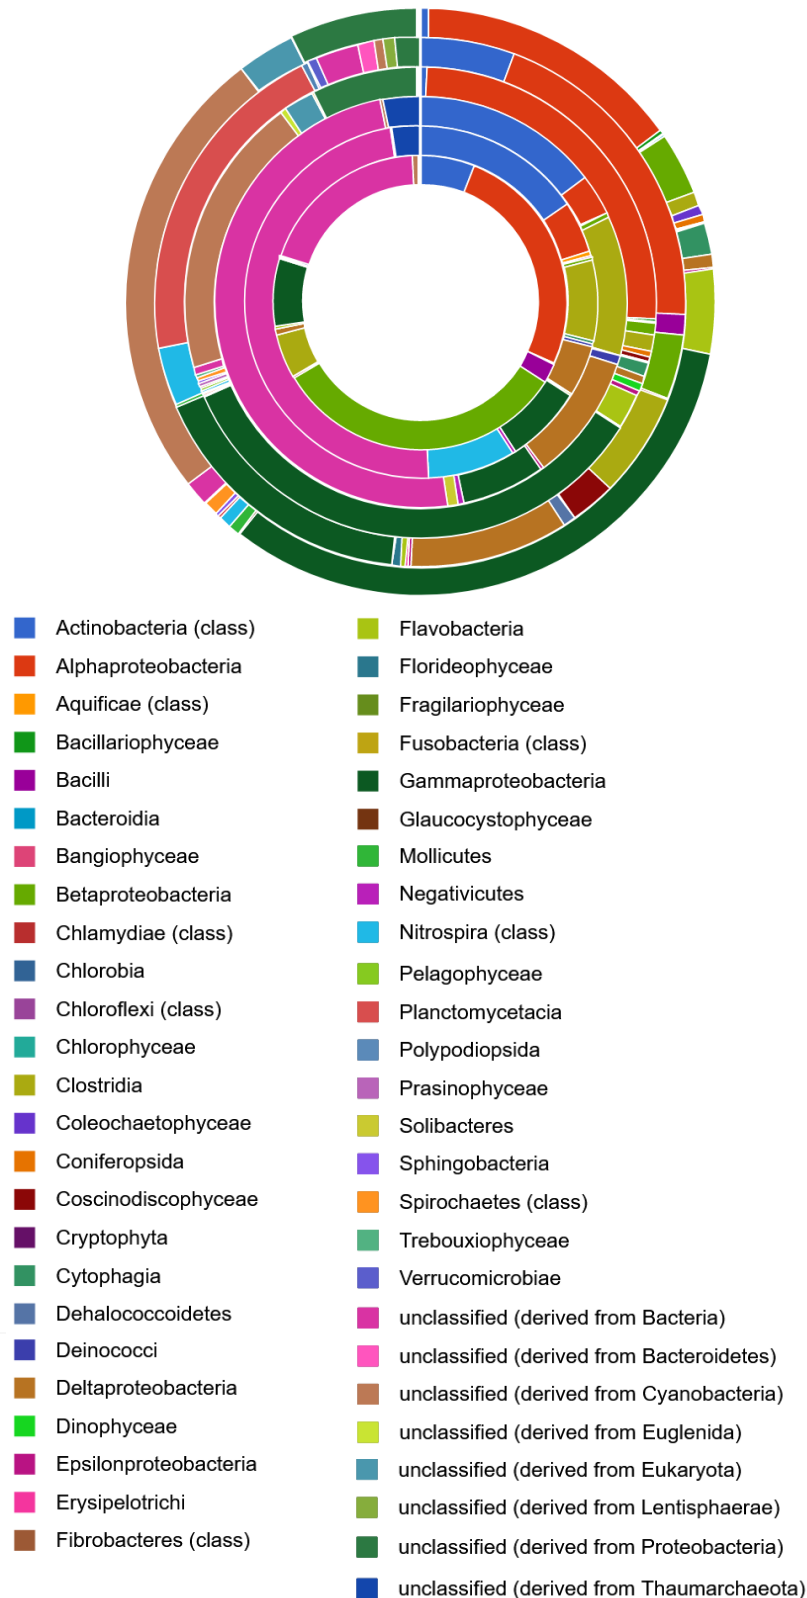

**Figure S4.** Donut chart showing the relative abundance of classes detected in the bacterial diversity profiles of this study and another similar study accessible via the MG-RAST public repository for comparison [42,43]. Starting from the inner circle are the bacterial communities from 1) *A. aaptos* of Redang Island; 2) *X. muta* of Bidong Island; 3) *A. aaptos* of Bidong Island; 4) *A. corrugata* of Broward County; 5) *A. corrugata* of Fort Lauderdale; 6) *A. corrugata* of Summerland Key.
